# Supplementary material
Source: PubMed Central journal article supplement (PMC9153083)
Supplement: mmc1.pdf [file mmc1.pdf]

**Cell Reports, Volume 39**

**Supplemental information**

**Antigenic and virological properties of an H3N2**

**variant that continues to dominate the 2021–22**

**Northern Hemisphere influenza season**

**Marcus J. Bolton, Jordan T. Ort, Ryan McBride, Nicholas J. Swanson, Jo Wilson, Moses Awofolaju, Colleen Furey, Allison R. Greenplate, Elizabeth M. Drapeau, Andrew Pekosz, James C. Paulson, and Scott E. Hensley**

## **Cell Reports**

### **Supplemental Information**

# **Antigenic and virological properties of an H3N2 variant that continues to dominate the 2021-2022 Northern Hemisphere influenza season**

Marcus J. Bolton, Jordan T. Ort, Ryan McBride, Nicholas J. Swanson, Jo Wilson, Moses Awofolaju, Colleen Furey, Allison R. Greenplate, Elizabeth M. Drapeau, Andrew Pekosz, James C. Paulson, Scott E. Hensley

Supplementary Table 1

| No | Common Name                                                                                                                                                                                     | Structure |
|----|-------------------------------------------------------------------------------------------------------------------------------------------------------------------------------------------------|-----------|
| 1  | Gal $\beta$ (1-4)-GlcNAc $\beta$ -ethyl-NH <sub>2</sub>                                                                                                                                         |           |
| 2  |                                                                                                                                                                                                 |           |
| 3  |                                                                                                                                                                                                 |           |
| 4  |                                                                                                                                                                                                 |           |
| 5  |                                                                                                                                                                                                 |           |
| 6  |                                                                                                                                                                                                 |           |
| 7  | Gal $\beta$ (1-4)-GlcNAc $\beta$ (1-2)-Man $\alpha$ (1-3)[Gal $\beta$ (1-4)-GlcNAc $\beta$ (1-2)-Man $\alpha$ (1-6)]-Man $\beta$ (1-4)-GlcNAc $\beta$ (1-4)-GlcNAc $\beta$ -Asn-NH <sub>2</sub> |           |
| 8  |                                                                                                                                                                                                 |           |
| 9  |                                                                                                                                                                                                 |           |
| 10 |                                                                                                                                                                                                 |           |
| 11 | NeuAca(2-3)-Gal $\beta$ (1-4)-6-O-sulfo-GlcNAc $\beta$ -propyl-NH <sub>2</sub>                                                                                                                  |           |
| 12 | NeuAca(2-3)-Gal $\beta$ (1-4)[Fuca(1-3)]-6-O-sulfo-GlcNAc $\beta$ -propyl-NH <sub>2</sub>                                                                                                       |           |

|    |                                                                                                   |  |
|----|---------------------------------------------------------------------------------------------------|--|
| 13 | NeuAca(2-3)-6-O-sulfo-Galβ(1-4)-GlcNAcβ-ethyl-NH <sub>2</sub>                                     |  |
| 14 | NeuAca(2-3)-6-O-sulfo-Galβ(1-4)-[Fuca(1-3)]-GlcNAcβ-propyl-NH <sub>2</sub>                        |  |
| 15 | NeuAca(2-3)-Galβ(1-3)-6-O-sulfo-GlcNAcβ-propyl-NH <sub>2</sub>                                    |  |
| 16 | NeuAca(2-3)-Galβ(1-4)-Glcβ-ethyl-NH <sub>2</sub>                                                  |  |
| 17 | NeuAca(2-3)-Galβ(1-4)-GlcNAcβ-ethyl-NH <sub>2</sub>                                               |  |
| 18 | NeuAca(2-3)-Galβ(1-4)-GlcNAcβ(1-3)-Galβ(1-4)-GlcNAcβ-ethyl-NH <sub>2</sub>                        |  |
| 19 | NeuAca(2-3)-Galβ(1-4)-GlcNAcβ(1-3)-Galβ(1-4)-GlcNAcβ(1-3)-Galβ(1-4)-GlcNAcβ-ethyl-NH <sub>2</sub> |  |
| 20 | NeuAca(2-3)-GalNAcβ(1-4)-GlcNAcβ-ethyl-NH <sub>2</sub>                                            |  |
| 21 | NeuAca(2-3)-Galβ(1-3)-GlcNAcβ-ethyl-NH <sub>2</sub>                                               |  |
| 22 | NeuAca(2-3)-Galβ(1-3)-GlcNAcβ(1-3)-Galβ(1-4)-GlcNAcβ-ethyl-NH <sub>2</sub>                        |  |
| 23 | NeuAca(2-3)-Galβ(1-3)-GlcNAcβ(1-3)-Galβ(1-3)-GlcNAcβ-ethyl-NH <sub>2</sub>                        |  |
| 24 | NeuAca(2-3)-Galβ(1-3)-GalNAcβ(1-3)-Gala(1-4)-Galβ(1-4)-Glcβ-ethyl-NH <sub>2</sub>                 |  |
| 25 | NeuAca(2-3)-Galβ(1-3)-GalNAca-Thr-NH <sub>2</sub>                                                 |  |

|    |                                                                                                                                                     |  |
|----|-----------------------------------------------------------------------------------------------------------------------------------------------------|--|
| 26 | 3' NeuAc LN Core 1 (1163)                                                                                                                           |  |
| 27 | 3' NeuAc DiLN Core 1 (1528)                                                                                                                         |  |
| 28 | 3' NeuAc TriLN Core 1 (1894)                                                                                                                        |  |
| 29 | 3' NeuAc TetraLN Core 1 (2259)                                                                                                                      |  |
| 30 | 3' NeuAc PentaLN Core 1 (2624)                                                                                                                      |  |
| 31 | NeuAc $\alpha$ (2-3)-Gal $\beta$ (1-4)-GlcNAc $\beta$ (1-6)-[Gal $\beta$ (1-3)]-GalNAc $\alpha$ -Thr-NH $_2$                                        |  |
| 32 | NeuAc $\alpha$ (2-3)-Gal $\beta$ (1-4)-GlcNAc $\beta$ (1-3)-Gal $\beta$ (1-4)-GlcNAc $\beta$ (1-6)-[Gal $\beta$ (1-3)]-GalNAc $\alpha$ -Thr-NH $_2$ |  |
| 33 | 3' NeuAc TriLN Core 2 (1894)                                                                                                                        |  |
| 34 | 3' NeuAc TetraLN Core 2 (2259)                                                                                                                      |  |
| 35 | 3' NeuAc PentaLN Core 2 (2624)                                                                                                                      |  |
| 36 | 3' NeuAc TetraLN TriLN Core 2 (3645)                                                                                                                |  |
| 37 | 3' NeuAc PentaLN TetraLN Core 2 (4376)                                                                                                              |  |
| 38 | NeuAc $\alpha$ (2-3)-Gal $\beta$ (1-4)-GlcNAc $\beta$ (1-3)-GalNAc $\alpha$ -Thr-NH $_2$                                                            |  |

|    |                                                                                                                                                                                                                                            |  |
|----|--------------------------------------------------------------------------------------------------------------------------------------------------------------------------------------------------------------------------------------------|--|
| 39 | NeuAc $\alpha$ (2-3)-Gal $\beta$ (1-4)-GlcNAc $\beta$ (1-3)-Gal $\beta$ (1-4)-GlcNAc $\beta$ (1-3)-GalNAcA-Thr-NH <sub>2</sub>                                                                                                             |  |
| 40 | 3' NeuAc TriLN Core 3 (1732)                                                                                                                                                                                                               |  |
| 41 | 3' NeuAc TetraLN Core 3 (2097)                                                                                                                                                                                                             |  |
| 42 | 3' NeuAc PentaLN Core 3 (2462)                                                                                                                                                                                                             |  |
| 43 | NeuAc $\alpha$ (2-3)-Gal $\beta$ (1-4)-GlcNAc $\beta$ (1-3)-[NeuAc $\alpha$ (2-3)-Gal $\beta$ (1-4)-GlcNAc $\beta$ (1-6)]-GalNAcA-Thr-NH <sub>2</sub>                                                                                      |  |
| 44 | NeuAc $\alpha$ (2-3)-Gal $\beta$ (1-4)-GlcNAc $\beta$ (1-3)-Gal $\beta$ (1-4)-GlcNAc $\beta$ (1-3)-Gal $\beta$ (1-4)-GlcNAc $\beta$ (1-6)]-GalNAcA-Thr-NH <sub>2</sub>                                                                     |  |
| 45 | 3' NeuAc TriLN Core4 (3118)                                                                                                                                                                                                                |  |
| 46 | 3' NeuAc TetraLN Core4 (3848)                                                                                                                                                                                                              |  |
| 47 | 3' NeuAc PentaLN Core4 (4579)                                                                                                                                                                                                              |  |
| 48 | 3' NeuAc TetraLN Core6 (2097)                                                                                                                                                                                                              |  |
| 49 | 3' NeuAc PentaLN Core6 (2462)                                                                                                                                                                                                              |  |
| 50 | 3' NeuAc LecLN I-Antigen(2104)                                                                                                                                                                                                             |  |
| 51 | NeuAc $\alpha$ (2-3)-Gal $\beta$ (1-4)-GlcNAc $\beta$ (1-2)-Man $\alpha$ (1-3)-[NeuAc $\alpha$ (2-3)-Gal $\beta$ (1-4)-GlcNAc $\beta$ (1-2)-Man $\alpha$ (1-6)]-Man $\beta$ (1-4)-GlcNAc $\beta$ (1-4)-GlcNAc $\beta$ -Asn-NH <sub>2</sub> |  |

|    |                                                                                                                                                                                                                                           |                                                                                     |
|----|-------------------------------------------------------------------------------------------------------------------------------------------------------------------------------------------------------------------------------------------|-------------------------------------------------------------------------------------|
| 52 | NeuAca(2-3)-Galβ(1-4)-GlcNAcβ(1-3)-Galβ(1-4)-GlcNAcβ(1-2)-Manα(1-3)[NeuAca(2-3)-Galβ(1-4)-GlcNAcβ(1-3)-Galβ(1-4)-GlcNAcβ(1-2)-Manα(1-6)]-Manβ(1-4)-GlcNAcβ(1-4)-GlcNAcβ-Asn-NH <sub>2</sub>                                               | 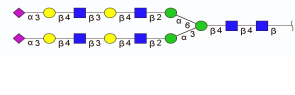   |
| 53 | NeuAca(2-3)-Galβ(1-4)-GlcNAcβ(1-3)-Galβ(1-4)-GlcNAcβ(1-3)-Galβ(1-4)-GlcNAcβ(1-2)-Manα(1-3)[NeuAca(2-3)-Galβ(1-4)-GlcNAcβ(1-3)-Galβ(1-4)-GlcNAcβ(1-3)-Galβ(1-4)-GlcNAcβ(1-2)-Manα(1-6)]-Manβ(1-4)-GlcNAcβ(1-4)-GlcNAcβ-Asn-NH <sub>2</sub> |    |
| 54 | 3' NeuAc DiLN Bi-(3594)                                                                                                                                                                                                                   |    |
| 55 | 3' NeuAc TriLN Bi-(4324)                                                                                                                                                                                                                  |    |
| 56 | 3' NeuAc TetraLN Bi-(4828)                                                                                                                                                                                                                |    |
| 57 | 3' NeuAc TriLN Bi-CF(4470)                                                                                                                                                                                                                |    |
| 58 | 3' NeuAc TetraLN Bi-CF(5200)                                                                                                                                                                                                              |  |
| 59 | 3' NeuAc DiLN Tri-(4615)                                                                                                                                                                                                                  |  |
| 60 | 3' NeuAc DiLN Tri-CF(4761)                                                                                                                                                                                                                |  |
| 61 | Gni/3'SLN/3'SLN-TriN                                                                                                                                                                                                                      |  |
| 62 | NeuAca(2-3)[GalNAcβ(1-4)]-Galβ(1-4)-GlcNAcβ-ethyl-NH <sub>2</sub>                                                                                                                                                                         |  |
| 63 | NeuAca(2-3)[GalNAcβ(1-4)]-Galβ(1-4)-Glcβ-ethyl-NH <sub>2</sub>                                                                                                                                                                            |  |
| 64 | Galβ(1-3)-GalNAcβ(1-4)[NeuAca(2-3)]-Galβ(1-4)-Glcβ-ethyl-NH <sub>2</sub>                                                                                                                                                                  |  |

|    |                                                                                                                                    |  |
|----|------------------------------------------------------------------------------------------------------------------------------------|--|
| 65 | NeuAca(2-3)-Galβ(1-4)[Fuca(1-3)]-GlcNAcβ-propyl-NH <sub>2</sub>                                                                    |  |
| 66 | NeuAca(2-3)-Galβ(1-3)[Fuca(1-4)]-GlcNAcβ(1-3)-Galβ(1-4)[Fuca(1-3)]-GlcNAcβ-ethyl-NH <sub>2</sub>                                   |  |
| 67 | NeuAca(2-3)-Galβ(1-4)[Fuca(1-3)]-GlcNAcβ(1-3)-Galβ(1-4)[Fuca(1-3)]-GlcNAcβ-ethyl-NH <sub>2</sub>                                   |  |
| 68 | NeuAca(2-3)-Galβ(1-4)[Fuca(1-3)]-GlcNAcβ(1-3)-Galβ(1-4)[Fuca(1-3)]-GlcNAcβ(1-3)-Galβ(1-4)[Fuca(1-3)]-GlcNAcβ-ethyl-NH <sub>2</sub> |  |
| 69 | 3' SLeX TrLN Core 1(2332)                                                                                                          |  |
| 70 | 3' SLeX TrLN Core 3(2170)                                                                                                          |  |
| 71 | 3' SLeX TrLN Core 4(3994)                                                                                                          |  |
| 72 |                                                                                                                                    |  |
| 73 | NeuAc(2-6)-Galb(1-4)-(6S)-GlcNacβ-ethyl-NH <sub>2</sub>                                                                            |  |
| 74 | NeuAca(2-6)-Galβ(1-4)-6-O-sulfo-GlcNAcβ-propyl-NH <sub>2</sub>                                                                     |  |
| 75 | NeuAca(2-6)-Galβ(1-4)-Glcβ-ethyl-NH <sub>2</sub>                                                                                   |  |
| 76 | NeuAca(2-6)-Galβ(1-4)-GlcNAcβ-ethyl-NH <sub>2</sub>                                                                                |  |
| 77 | NeuAca(2-6)-Galβ(1-4)-GlcNAcβ(1-3)-Galβ(1-4)-GlcNAcβ-ethyl-NH <sub>2</sub>                                                         |  |



|    |                                                                                                   |  |
|----|---------------------------------------------------------------------------------------------------|--|
| 78 | NeuAca(2-6)-Galβ(1-4)-GlcNAcβ(1-3)-Galβ(1-4)-GlcNAcβ(1-3)-Galβ(1-4)-GlcNAcβ-ethyl-NH <sub>2</sub> |  |
| 79 | NeuAca(2-6)-GalNAcβ(1-4)-GlcNAcβ-ethyl-NH <sub>2</sub>                                            |  |
| 80 | 6' NeuAc LN Core 1 (1163)                                                                         |  |
| 81 | 6' NeuAc DiLN Core 1 (1528)                                                                       |  |
| 82 | 6' NeuAc TriLN Core 1 (1894)                                                                      |  |
| 83 | 6' NeuAc TetraLN Core 1 (2259)                                                                    |  |
| 84 | 6' NeuAc PentaLN Core 1 (2624)                                                                    |  |
| 85 | NeuAca(2-6)-Galβ(1-4)-GlcNAcβ(1-6)-[Galβ(1-3)]-GalNAcA-Thr-NH <sub>2</sub>                        |  |
| 86 | NeuAca(2-6)-Galβ(1-4)-GlcNAcβ(1-3)-Galβ(1-4)-GlcNAcβ(1-6)-[Galβ(1-3)]-GalNAcA-Thr-NH <sub>2</sub> |  |
| 87 | 6' NeuAc TriLN Core 2 (1894)                                                                      |  |
| 88 | 6' NeuAc TetraLN Core 2 (2259)                                                                    |  |
| 89 | 6' NeuAc PentaLN Core 2 (2624)                                                                    |  |
| 90 | 6' NeuAc TetraLN TriLN Core 2 (3645)                                                              |  |

|     |                                                                                                                                                                                                                                    |  |
|-----|------------------------------------------------------------------------------------------------------------------------------------------------------------------------------------------------------------------------------------|--|
| 91  | 6' NeuAc PentaLN TetraLN Core 2 (4376)                                                                                                                                                                                             |  |
| 92  | NeuAc $\alpha$ (2-6)-Gal $\beta$ (1-4)-GlcNAc $\beta$ (1-3)-GalNAc-Thr-NH <sub>2</sub>                                                                                                                                             |  |
| 93  | NeuAc $\alpha$ (2-6)-Gal $\beta$ (1-4)-GlcNAc $\beta$ (1-3)-Gal $\beta$ (1-4)-GlcNAc $\beta$ (1-3)-GalNAc-Thr-NH <sub>2</sub>                                                                                                      |  |
| 94  | 6' NeuAc TriLN Core 3 (1732)                                                                                                                                                                                                       |  |
| 95  | 6' NeuAc TetraLN Core 3 (2097)                                                                                                                                                                                                     |  |
| 96  | 6' NeuAc PentaLN Core 3 (2462)                                                                                                                                                                                                     |  |
| 97  | NeuAc $\alpha$ (2-6)-Gal $\beta$ (1-4)-GlcNAc $\beta$ (1-3)-[NeuAc $\alpha$ (2-6)-Gal $\beta$ (1-4)-GlcNAc $\beta$ (1-6)]-GalNAc-Thr-NH <sub>2</sub>                                                                               |  |
| 98  | NeuAc $\alpha$ (2-6)-Gal $\beta$ (1-4)-GlcNAc $\beta$ (1-3)-Gal $\beta$ (1-4)-GlcNAc $\beta$ (1-3)-[NeuAc $\alpha$ (2-6)-Gal $\beta$ (1-4)-GlcNAc $\beta$ (1-3)-Gal $\beta$ (1-4)-GlcNAc $\beta$ (1-6)]-GalNAc-Thr-NH <sub>2</sub> |  |
| 99  | 6' NeuAc TriLN Core4 (3118)                                                                                                                                                                                                        |  |
| 100 | 6' NeuAc TetraLN Core4 (3848)                                                                                                                                                                                                      |  |
| 101 | 6' NeuAc PentaLN Core4 (4579)                                                                                                                                                                                                      |  |
| 102 | 6' NeuAc TetraLN Core6 (2097)                                                                                                                                                                                                      |  |
| 103 | 6' NeuAc PentaLN Core6 (2462)                                                                                                                                                                                                      |  |

|     |                                                                                                                                                                                                                                            |  |
|-----|--------------------------------------------------------------------------------------------------------------------------------------------------------------------------------------------------------------------------------------------|--|
| 104 | 6' NeuAc TriLN I-Antigen (2856)                                                                                                                                                                                                            |  |
| 105 | 6' NeuAc DiLN I-Antigen (2104)                                                                                                                                                                                                             |  |
| 106 | Galβ(1-4)-GlcNAcβ(1-2)-Mana(1-3)[NeuAca(2-6)-Galβ(1-4)-GlcNAcβ(1-2)-Mana(1-6)]-Manβ(1-4)-GlcNAcβ(1-4)-GlcNAcβ-Asn-NH <sub>2</sub>                                                                                                          |  |
| 107 | NeuAca(2-6)-Galβ(1-4)-GlcNAcβ(1-2)-Mana(1-3)[Galβ(1-4)-GlcNAcβ(1-2)-Mana(1-6)]-Manβ(1-4)-GlcNAcβ(1-4)-GlcNAcβ-Asn-NH <sub>2</sub>                                                                                                          |  |
| 108 | GlcNAcβ(1-2)-Mana(1-3)[NeuAca(2-6)-Galβ(1-4)-GlcNAcβ(1-2)-Mana(1-6)]-Manβ(1-4)-GlcNAcβ(1-4)-GlcNAcβ-Asn-NH <sub>2</sub>                                                                                                                    |  |
| 109 | NeuAca(2-6)-Galβ(1-4)-GlcNAcβ(1-2)-Mana(1-3)-[NeuAca(2-6)-Galβ(1-4)-GlcNAcβ(1-2)-Mana(1-6)]-Manβ(1-4)-GlcNAcβ(1-4)-GlcNAcβ-Asn-NH <sub>2</sub>                                                                                             |  |
| 110 | NeuAca(2-6)-Galβ(1-4)-GlcNAcβ(1-3)-Galβ(1-4)-GlcNAcβ(1-2)-Mana(1-3)[NeuAca(2-6)-Galβ(1-4)-GlcNAcβ(1-3)-Galβ(1-4)-GlcNAcβ(1-2)-Mana(1-6)]-Manβ(1-4)-GlcNAcβ(1-4)-GlcNAcβ-Asn-NH <sub>2</sub>                                                |  |
| 111 | 6' NeuAc DiLN Bi-(3594)                                                                                                                                                                                                                    |  |
| 112 | NeuAca(2-6)-Galβ(1-4)-GlcNAcβ(1-3)-Galβ(1-4)-GlcNAcβ(1-3)-Galβ(1-4)-GlcNAcβ(1-2)-Mana(1-3)-[NeuAca(2-6)-Galβ(1-4)-GlcNAcβ(1-3)-Galβ(1-4)-GlcNAcβ(1-3)-Galβ(1-4)-GlcNAcβ(1-2)-Mana(1-6)]-Manβ(1-4)-GlcNAcβ(1-4)-GlcNAcβ-Asn-NH <sub>2</sub> |  |
| 113 | 6' NeuAc TriLN Bi-(4324)                                                                                                                                                                                                                   |  |
| 114 | 6' NeuAc TetraLN Bi-(4828)                                                                                                                                                                                                                 |  |
| 115 | 6' NeuAc DiLN Bi-CF(3740)                                                                                                                                                                                                                  |  |
| 116 | 6' NeuAc TriLN Bi-CF(4470)                                                                                                                                                                                                                 |  |

|     |                              |  |
|-----|------------------------------|--|
| 117 | 6' NeuAc TetraLN Bi-CF(5200) |  |
| 118 | 6' NeuAc DiLN Tri(4615)      |  |
| 119 | 6' NeuAc DiLN Tri-CF(4761)   |  |
| 120 | LN/6'SLN/6'SLN-TriN          |  |
| 121 | 6'SLN/LeX/LeX-TriN           |  |
| 122 | 6'SLN/LeX/LeX-TriN           |  |

**Supplementary Table 1. List of glycan moieties used in this study.** Key for glycan moieties: purple diamond; sialic acid, yellow circle; galactose, green circle; mannose, blue square; N-acetylglucosamine, red triangle; fucose, yellow square; N-acetylgalactosamine.

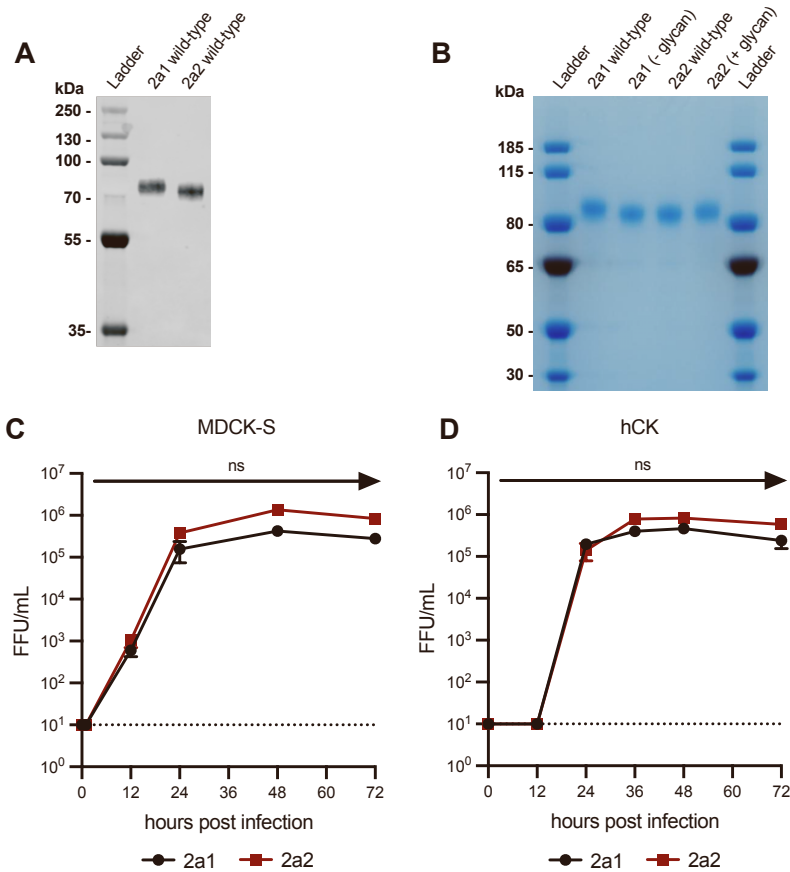

**Figure S1. Characterization of 2a1 and 2a2 H3N2 viruses, Related to Figure 1.**

**a** Western blot analysis of HA proteins from wild-type 2a1 and 2a2 viruses.

**b** SDS-PAGE analysis of wild-type and mutant recombinant HA proteins. Mutant 2a1 HA proteins had N159 and I160 substitutions to remove glycosylation motif, and mutant 2a2 HA proteins had Y159 and T160 substitutions to add glycosylation motif.

**c,d** Infectious virus production following infection with virus at MOI of 0.0001 in MDCK-S (**c**) and hCK (**d**) cells incubated at 37°C. Virus titers in supernatant were measured by focus forming unit assay on MDCK-S cells. Statistical comparison of viruses was completed using a Welch's t-test on log<sub>10</sub>-transformed titers at each timepoint post infection (\*p≤0.05).

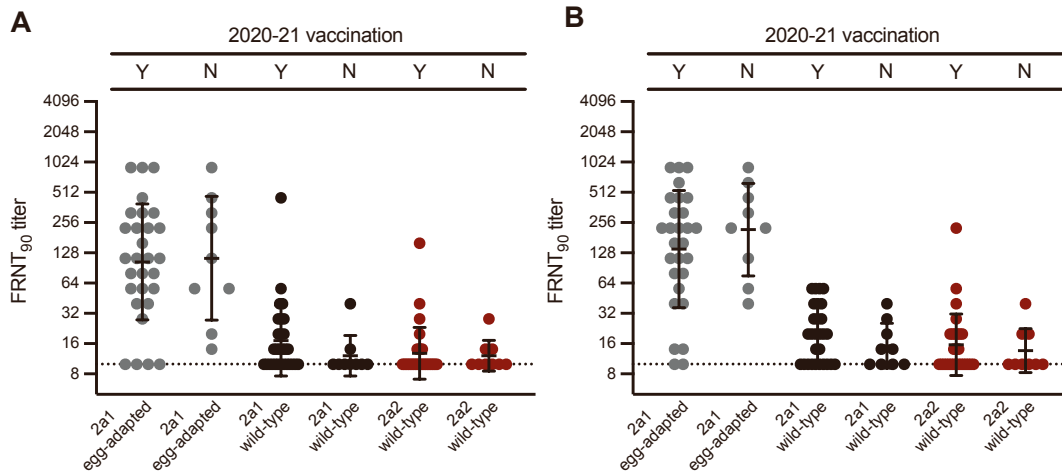

**Figure S2. Prior year vaccination does not affect antibody magnitude, Related to Figure**

**2.**

Pre-vaccination (**a**) and post-vaccination (**b**) neutralization titers stratified by previous year (2020-21) vaccination status. Two vaccine recipients from Figure 2 had unknown vaccination status in 2020-21, and so were excluded from this analysis.
